# Supplementary material for: Multi-hallmark long noncoding RNA maps reveal non-small cell lung cancer vulnerabilities
Source: PubMed Central journal article supplement — Cell Genom. 2022 Aug 22;2(9):100171. doi: 10.1016/j.xgen.2022.100171 (PMC9903773; doi:10.1016/j.xgen.2022.100171), 2022-08-22
Supplement: mmc1.pdf [file mmc1.pdf]

## Supplemental information

### **Multi-hallmark long noncoding RNA maps reveal non-small cell lung cancer vulnerabilities**

**Roberta Esposito, Taisia Polidori, Dominik F. Meise, Carlos Pulido-Quetglas, Panagiotis Chouvardas, Stefan Forster, Paulina Schaerer, Andrea Kobel, Juliette Schlatter, Erik Kerkhof, Michaela Roemmele, Emily S. Rice, Lina Zhu, Andrés Lanzós, Hugo A. Guillen-Ramirez, Giulia Basile, Irene Carrozzo, Adrienne Vancura, Sebastian Ullrich, Alvaro Andrades, Dylan Harvey, Pedro P. Medina, Patrick C. Ma, Simon Haefliger, Xin Wang, Ivan Martinez, Adrian F. Ochsenbein, Carsten Riether, and Rory Johnson**

Figure S1

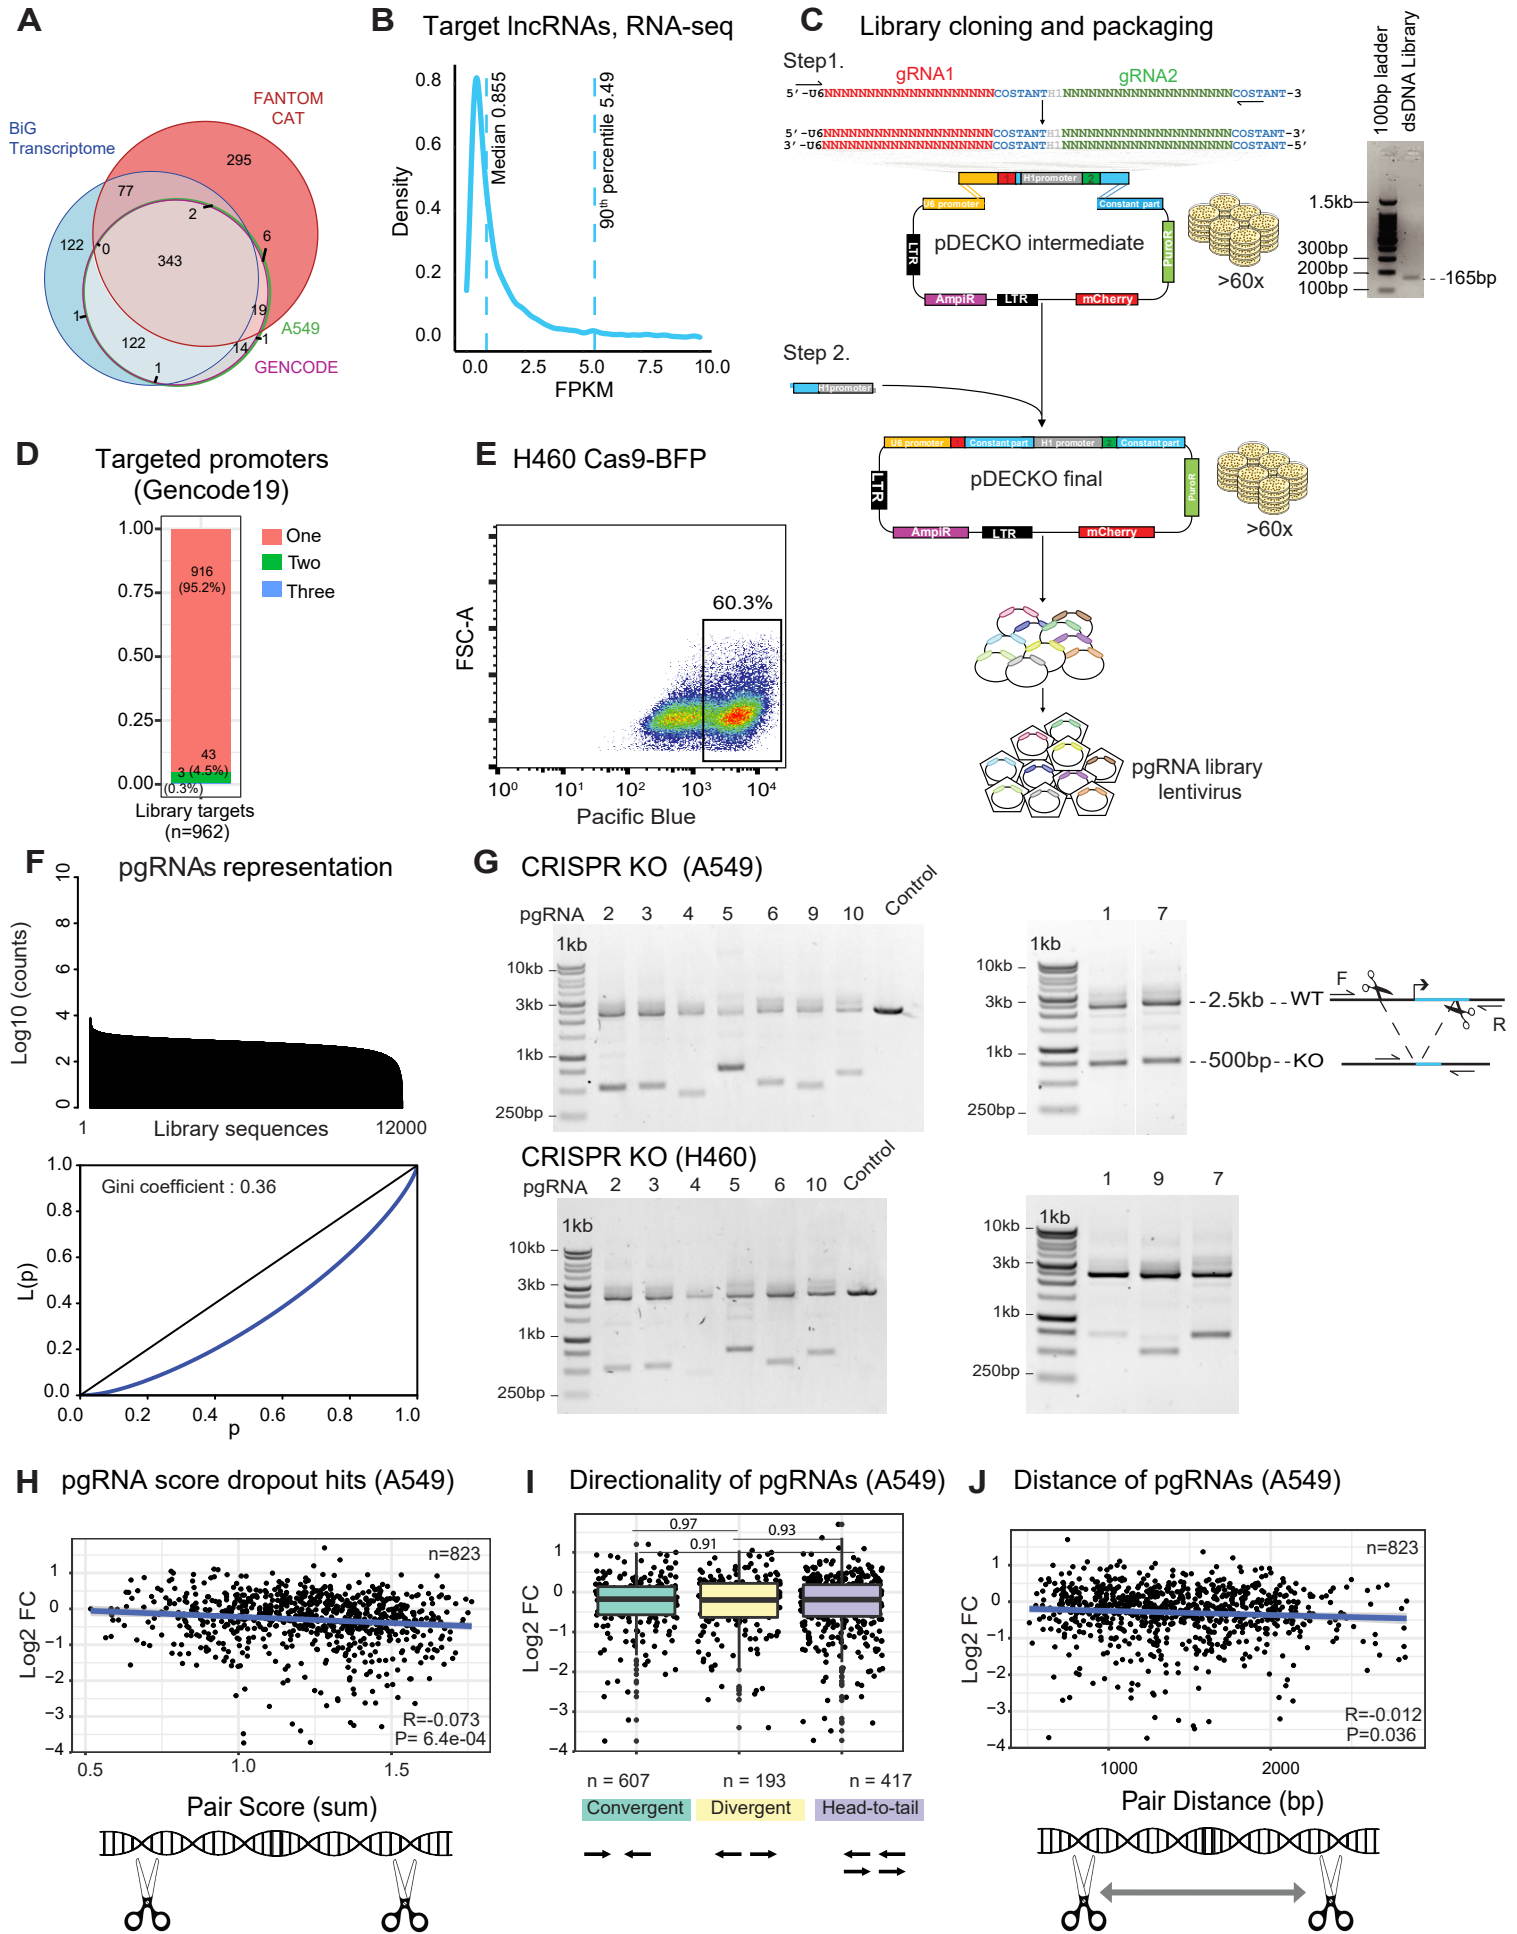

### **Figure S1. libDECKO-NSCLC1 library creation. Related to Figure 1.**

(A) Library design pipeline. LncRNAs from indicated annotations are merged and filtered by TSS proximity to protein-coding genes (<2 kb excluded) and by expression in A549 (<0.1 FPKM excluded). TSS are clustered together if closer than 300bp, then selected based on three evidence sources: CAGE, ChromHMM and DNaseI hypersensitivity. TSS candidates are targeted by 10 paired guide RNA (pgRNA) designs using CRISPETa.

(B) Expression of targeted lncRNAs in A549 cells.

(C) Library cloning. Oligonucleotide library of pgRNAs is amplified by PCR. Two steps of cloning to insert the amplified fragment and the constant part into the pDECKO backbone. Coverage of clones to library sequences was estimated to be >60x. The plasmid library is packaged into viral particles.

(D) Number of independent annotated genes' TSS/promoters targeted by each candidate region. 95.2% of the library targets single lncRNA genes, 4.8% of candidate regions contain two or three independent TSS. Note that classical "bidirectional promoters" comprise TSS from two independent lncRNA genes (green), while a small number of targeted regions (3, blue) contain TSS from three independent lncRNA genes.

(E) Fluorescence activated cell sorting (FACS) was used to sort stable Cas9-expressing H460 cells based on expression of a Blue Fluorescent Protein (BFP) marker. The box indicates the sorted cell populations used in screens.

(F) Library representation. Upper panel: y-axis: Number of reads per pgRNA sequence; x-axis: ranked pgRNAs from library. Less than 0.5% of the total pgRNAs constructs dropped out with no reads. The ratio of 10th – 90th percentile is 4.6-fold. Lower panel: Lorenz curve, depicting library read coverage. Equality is represented by the diagonal.

(G) DNMBP-AS1 locus was targeted by CRISPR-deletion in A549 and H460 cells with multiple pgRNAs. The gene locus as well as the genotyping PCR primers (F, R) are shown in Figure 1E. Agarose gels showing template genomic DNA (gDNA) from cells transfected with non-targeting pgRNA (Control) or DNMBP-AS1 TSS pgRNAs (KO).

(H) Figure depicts pgRNAs targeting lncRNA candidates defined as hits (A549 dropout, FDR<0.2). y-axis: log<sub>2</sub> FC (fold change) in abundance; x-axis: sum of individual sgRNA scores for each pair from RuleSet2 algorithm. Significance estimated using linear model.

(I) as for (H), but separating pgRNAs according to the orientation of their individual sgRNAs.

(J) as for (H), but now for the genomic distance (bp) between the sgRNAs of each pgRNA.



Figure S2

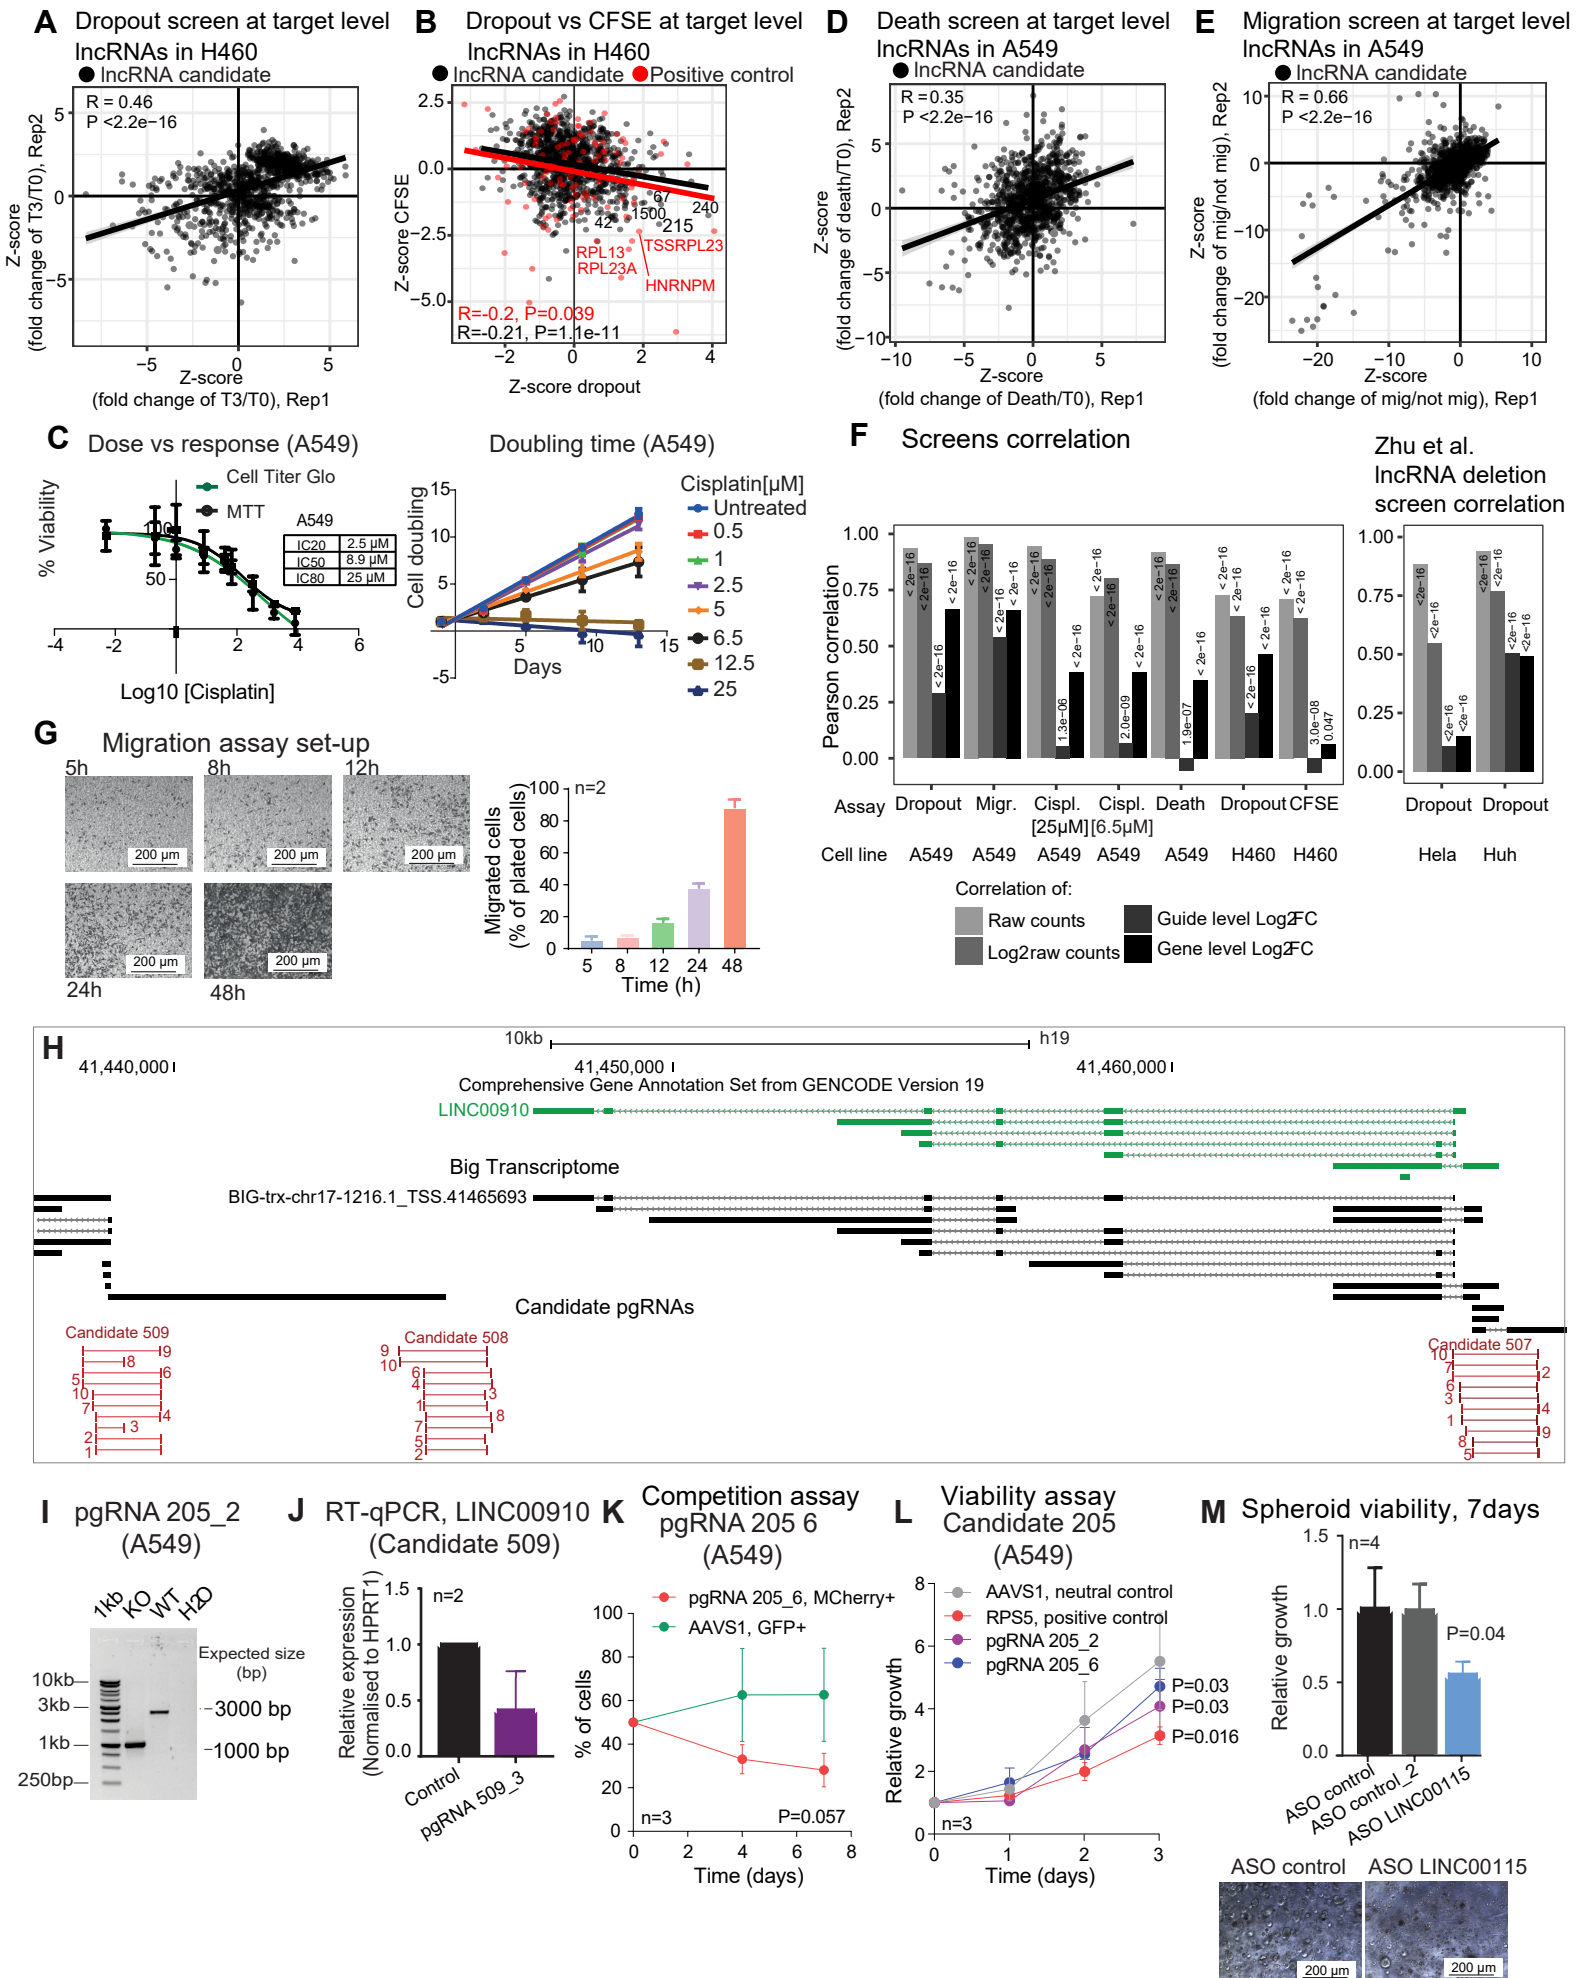

**Figure S2. Assessing screen accuracy. Related to Figure 2.**

(A) LncRNA candidates (black) correlation between biological replicates of the dropout screen in H460 cells. Data presented as Z-score transformed log<sub>2</sub> FC values. T3: time point three weeks. T0: time point zero. Statistical significance: Pearson correlation.

(B) LncRNA candidates (black) correlation distinct from the positive controls (red) correlation in negative dropout and positive CFSE screens in H460 cells. Data presented as Z-score transformed log<sub>2</sub> FC values. Statistical significance: Pearson correlation.

(C) (Left) Cisplatin dose-response curves in A549 and H460 cells. Error bars: standard deviation. (Right) Cell doublings calculated at indicated cisplatin concentrations. Error bars: standard deviation.

(D) LncRNA candidates (black) correlation between biological replicates of the death screen in A549 cells. Data presented as Z-score transformed log<sub>2</sub> FC values. Statistical significance: Pearson correlation.

(E) LncRNA candidates (black) correlation between biological replicates of the migration screen in A549 cells. Data presented as Z-score transformed log<sub>2</sub> FC values. Statistical significance: Pearson correlation.

(F) Replicates correlation is shown at three levels (raw reads: invariably display high correlations but provide little insight into replicability; pgRNA: typically display lower correlation and may be affected by stochastic effects when library coverage is low; gene levels: integrate the fold changes from the multiple individual pgRNAs. The latter is the most biologically-meaningful readout where technical noise may be overcome through sgRNA integration. (Left) Summary of the screens' correlation. (Right) Zhu et al. 2016<sup>49</sup> deletion screen correlation. Only lncRNA candidates are taken into account.

(G) Migration screen set-up. A549 cells (0.5M cells/well) were seeded onto transwell inserts and allowed to migrate for the indicated times. After crystal violet staining, cells that migrated through the membrane counted in five randomly selected fields. Results are expressed as means ± standard deviation (n=2).

(H) Genomic locus of Candidate 507, 508 and 509. i) Assaying genomic deletion with pgRNAs for Candidate 205: figure shows agarose gel electrophoresis of PCR product with primers (Supplementary File 5) amplifying the Candidate 205 target region.

(J) RT-qPCR with primers for Candidate 509 RNA (Supplementary File 5). Error bars: standard deviation.

(K) Competition assay with an additional pgRNA targeting Candidate 205. The plot shows the percentage of mCherry+ or GFP+ cells at indicated times (n=3 biological replicates; error bar: standard deviation; two-tailed Student's *t* test).

(I) Cell viability assay with the two pgRNAs targeting Candidate 205 (n=3 biological replicates; error bar: standard deviation; two-tailed Student's *t* test). The cell viability was measured by using the CellTiter-Glo® 2D.

(M) Cell viability in 3D spheroids grown from H441 cells upon ASO knockdown of *LINC00115*. The viability was measured with CellTiter-Glo® 3D, seven days after ASO transfection (n=4 biological replicates; error bars: standard deviation; statistical significance: one-tailed Student's *t* test).

Figure S3

**A**

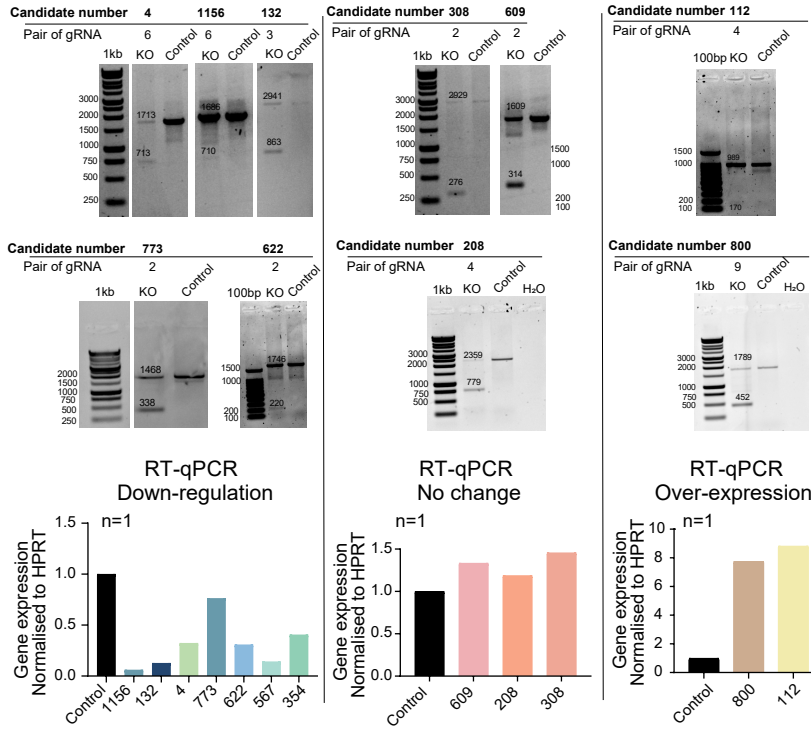

**B**

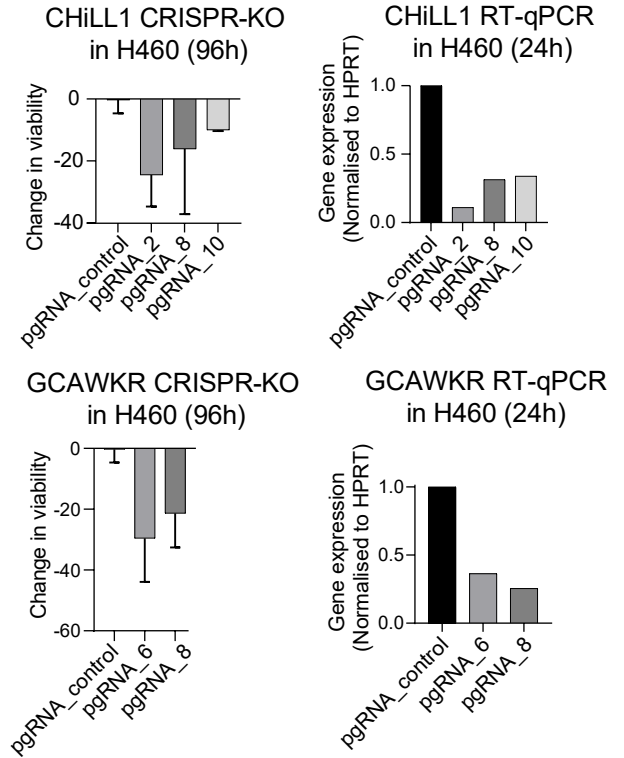

**C**

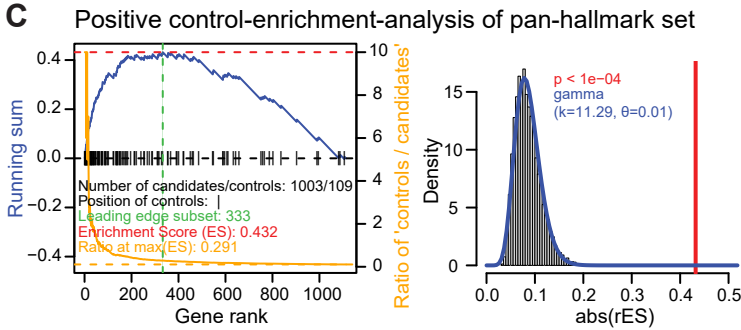

**Neutral control-enrichment-analysis of pan-hallmark set**

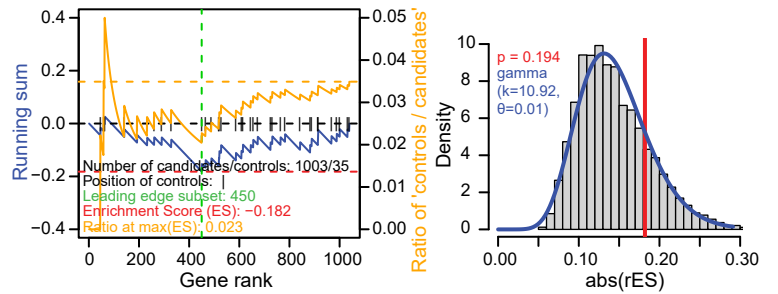

**D**

Common hits among single phenotype and pan-hallmark

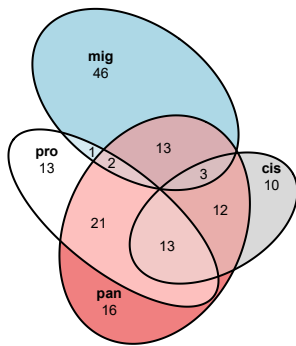

**E**

TCGA-LUAD copy number in TPP pan-hallmark

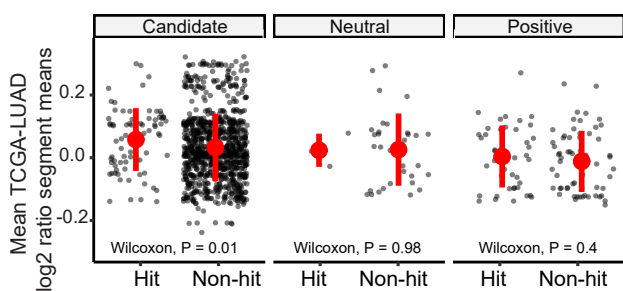

**F**

CCLE copy number in TPP pan-hallmark

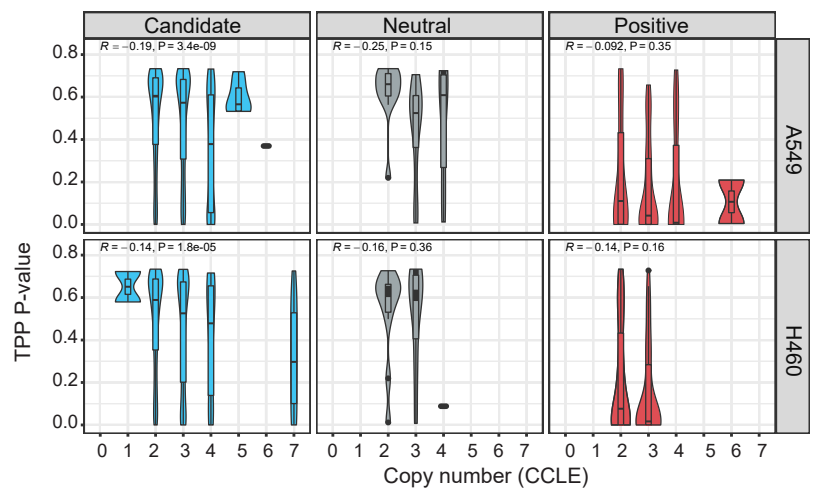

**Figure S3. Validation of the method, TPP quality assessment and CNV analysis.**  
**Related to figure 3.**

(A) Randomly picked pgRNAs show intended genomic deletion and expression changes in A549-Cas9-BFP. The genomic DNA (gDNA) and RNA were extracted 7 days after transfection. (Top) PCR products from the template genomic DNA (gDNA) of cells transfected with non-targeting pgRNA (Control) or targeting pgRNAs (KO). The expected lengths for Control, and deletion amplicons are indicated. (Bottom) RT-qPCR measurements of the selected genes. 7/12 downregulated genes (left), 3/12 genes with no change in expression (centre), 2/12 upregulated (right).

(B) (Left) Cell viability assay with the three pgRNAs targeting *CHILL1*, and two pgRNAs targeting *GCAWKR* in H460-Cas9-BFP cells (n=2 biological replicates; error bar: standard deviation). Cells were transfected, and selected for 7 days with puromycin, then plated for the assay. The cell viability was measured by using the CellTiter-Glo® 2D. (Right) RT-qPCR measurements of the *CHILL1* and *GCAWKR* expression upon CRISPR-KO with different pgRNAs. RNA extracted 24h after the start of the viability assay.

(C) (Left) Enrichment of positive controls in the top of the TPP ranking results by gene set enrichment analysis (GSEA). The running sum (blue) is calculated by iterating through the ranks, increasing with positive controls, decreasing otherwise. The maximum absolute value of the running sum is the Enrichment Score (ES). Black ticks on the x-axis represent the location of positive controls. The significance of the enrichment is nominally evaluated by simulating 10,000 perturbations of the labelling of the genes. (Right) The same analysis with neutral controls.

(D) The intersection of hits identified by Target Prioritisation Pipeline (TPP) in the indicated datasets. Pro: proliferation; Cis: cisplatin; Mig: migration; Pan: pan-hallmarks, integration of all the screens together.

(E) Copy number status in TCGA-LUAD samples for pan-hallmark lncRNA hits. For each candidate or control, the log<sub>2</sub> (ratio segment means) of each TCGA-LUAD sample was retrieved for the library target region. Then, the log<sub>2</sub> ratio segment means across TCGA-LUAD were averaged for each candidate or control. Red dots and lines display the mean and the standard deviation, respectively. Statistical significance: Wilcoxon test

(F) Relationship between pan-hallmark TPP scores (uncorrected P-values) (y-axis) and copy number status (x-axis) in A549 or H460. Copy number status of the library

target regions was retrieved from the Cancer Cell Line Encyclopedia (CCLE).  
Statistical significance: Pearson correlation.

Figure S4

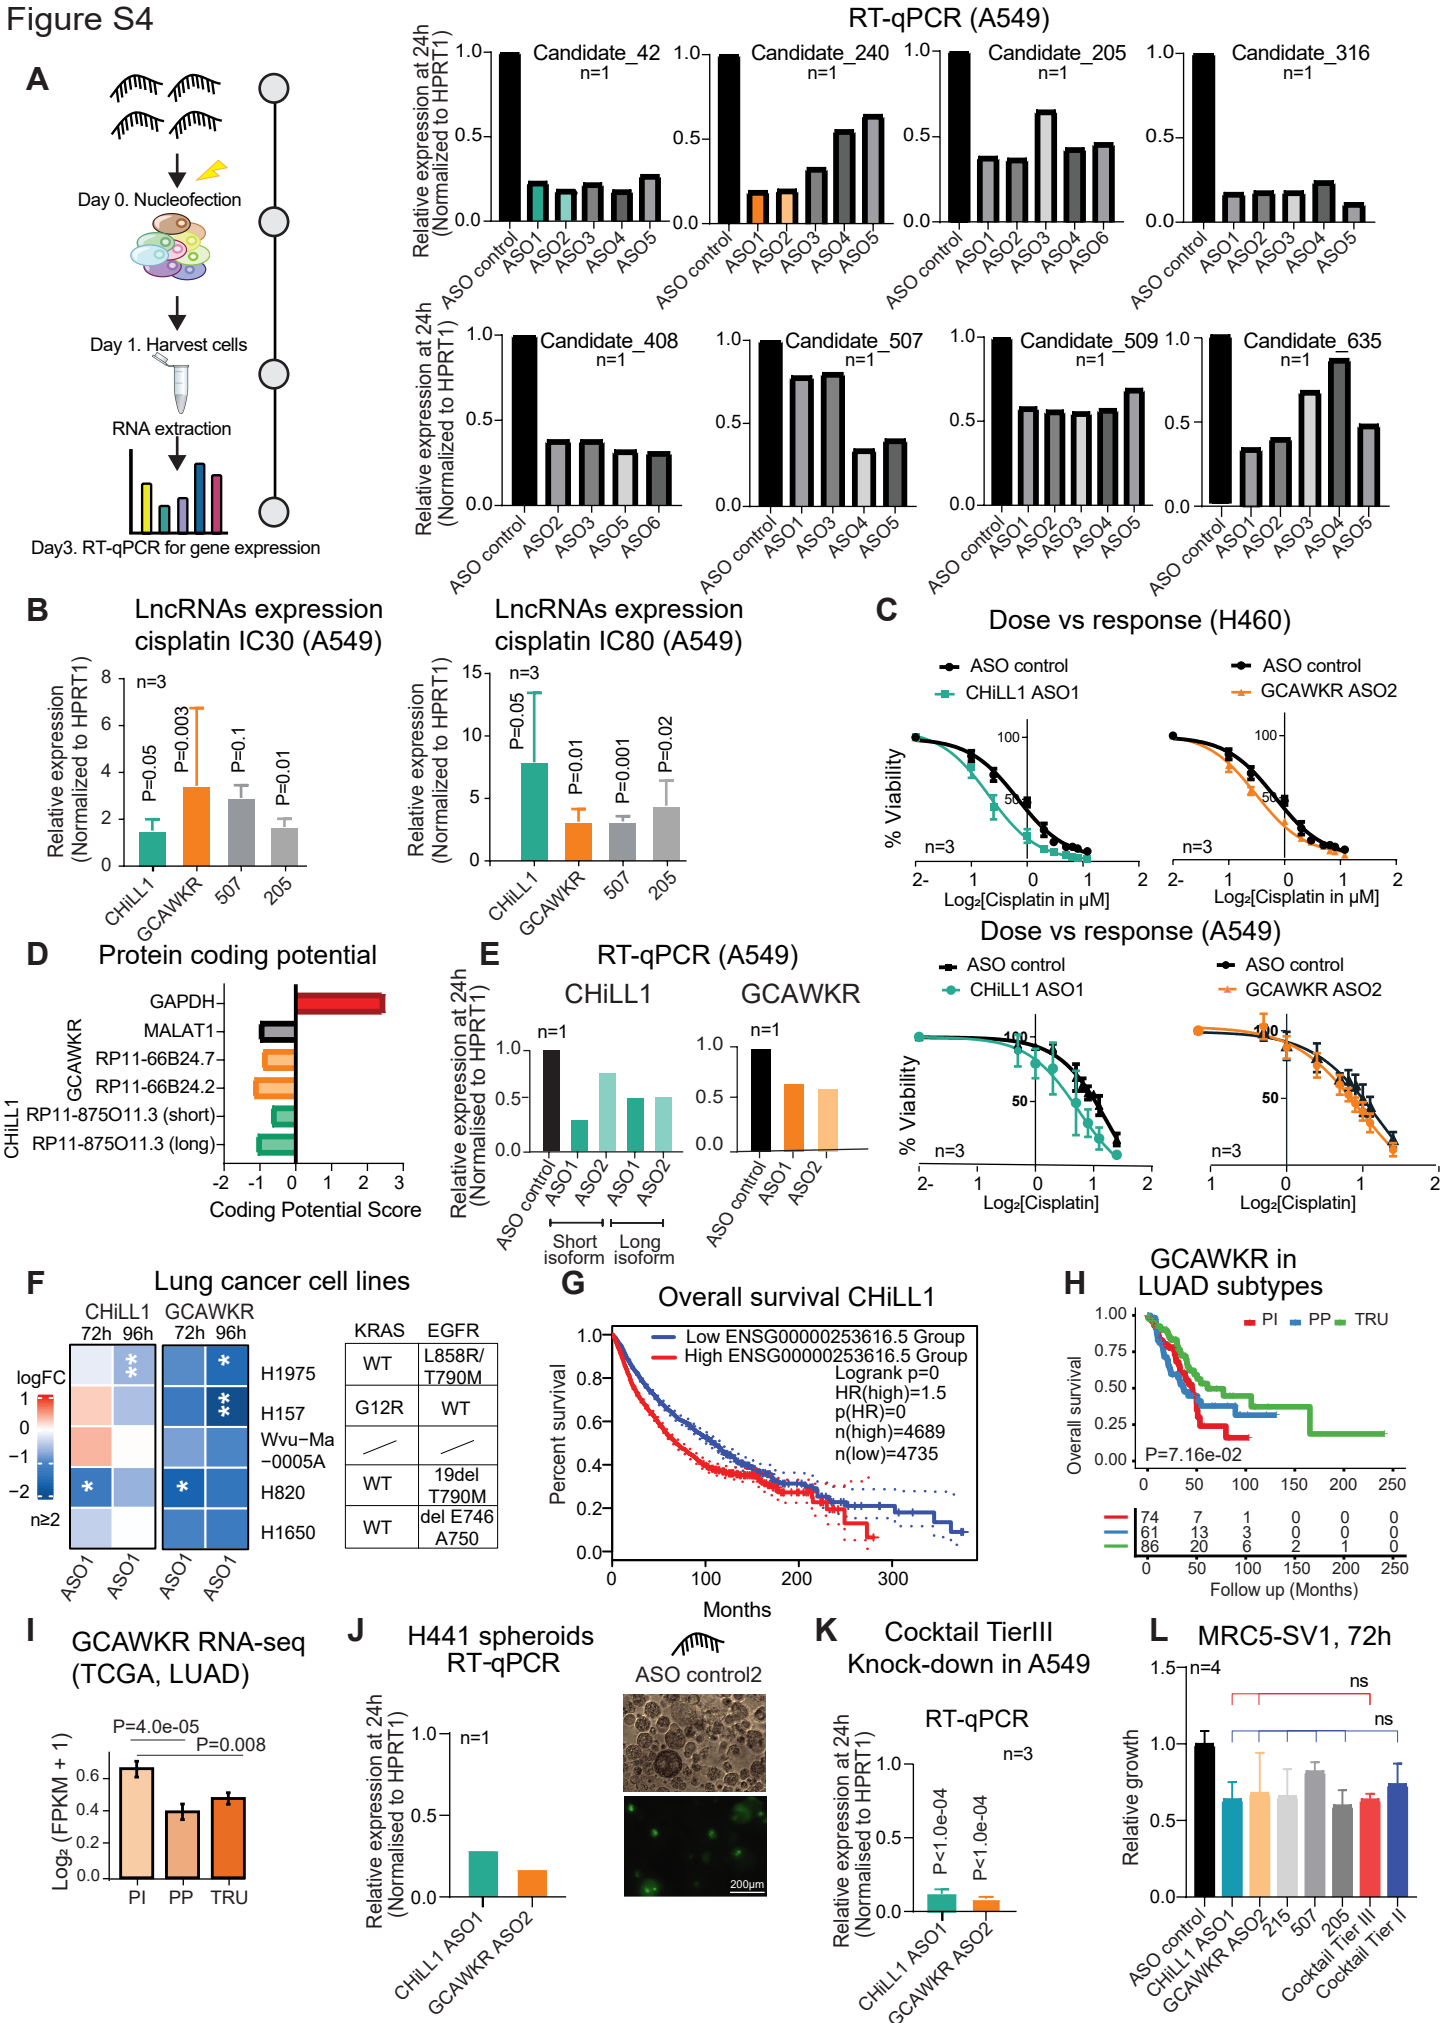



**Figure S4. Tier 2 candidates and cancer hallmarks. Related to Figure 4.**

(A) (Left) Experimental strategy to test ASO knockdown effectiveness. (Right) Measured gene knockdown by RT-qPCR in response to ASOs.

(B) RT-qPCR of Tier 2 candidates in A549 cells treated with cisplatin IC30 (left) and IC80 (right panel) for 72 h. The control represents the reference expression of the genes in untreated conditions. (n=3, error bars: standard deviation; statistical significance: one-tailed Student's *t* test).

(C) Dose response curves in H460 (top) and A549 (bottom) in cells transfected with ASO control and the best performing ASOs for *CHILL1* (left) and *GCAWKR* (right). Error bars: standard deviation.

(D) Coding Potential Scores (CPS) of *CHILL1* and *GCAWKR* transcripts using the algorithm Coding Potential Calculator<sup>120</sup>. *GAPDH* and *MALAT1* transcripts were used as reference for the protein-coding and non-protein coding, respectively.

(E) *CHILL1* and *GCAWKR* knockdown efficiency measured by RT-qPCR, using two independent ASOs.

(F) The effect of *CHILL1* and *GCAWKR* ASOs in additional NSCLC cell lines. Mutational status is indicated on the right. Columns: time points for the cell viability measurements. Values reflect the mean log<sub>2</sub> FC in viability following ASO transfection, with respect to a control non-targeting ASO, from at least two independent biological replicates. One-tailed Student's *t* test. \* indicate P < 0.05; \*\* indicate P < 0.01.

(G) Kaplan–Meier survival analysis of *CHILL1*. Analysis was performed using GEPIA2 tool with default settings<sup>121</sup>, including all the tumours types available in the TCGA dataset.

(H) Kaplan–Meier survival analysis of *GCAWKR* in TCGA data within transcriptional subtypes. Proximal-inflammatory (PI), proximal-proliferative (PP) and terminal respiratory unit (TRU).

(I) *GCAWKR* expression in transcriptional sub-types in TCGA dataset (n=513, Wilcoxon signed-rank tests). Proximal-inflammatory (PI), proximal-proliferative (PP) and terminal respiratory unit (TRU).

(J) Knockdown efficiency measured by RT-qPCR in 3D spheroids with *CHILL1* and *GCAWKR* ASOs relative to ASO control. Error bars: standard deviation. On the right: representative pictures of spheroids transfected with green fluorescent-labelled ASOs.

(K) Knockdown efficiency of *CHILL1* and *GCAWKR* measured in the cocktail experiment in A549 cells with *CHILL1* and *GCAWKR* ASOs relative to ASO control



(n=3 biological replicates; error bars: standard deviation; statistical significance: two-tailed Student's *t* test).

(L) Growth of MRC5-SV1 cells in response to indicate ASO transfections (n=4 biological replicates; error bars: standard deviation; statistical significance: one-tailed Student's *t* test).

Figure S5

**A** CHILL1 locus

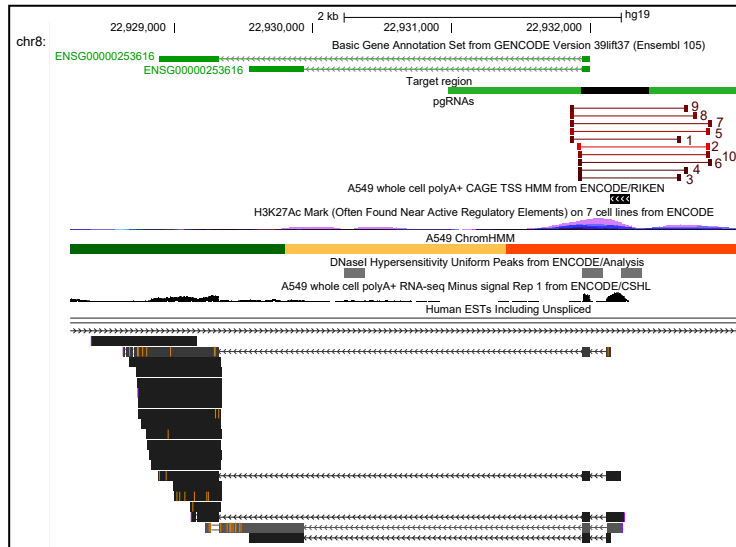

**B** CHILL1 locus and RT-PCR set up

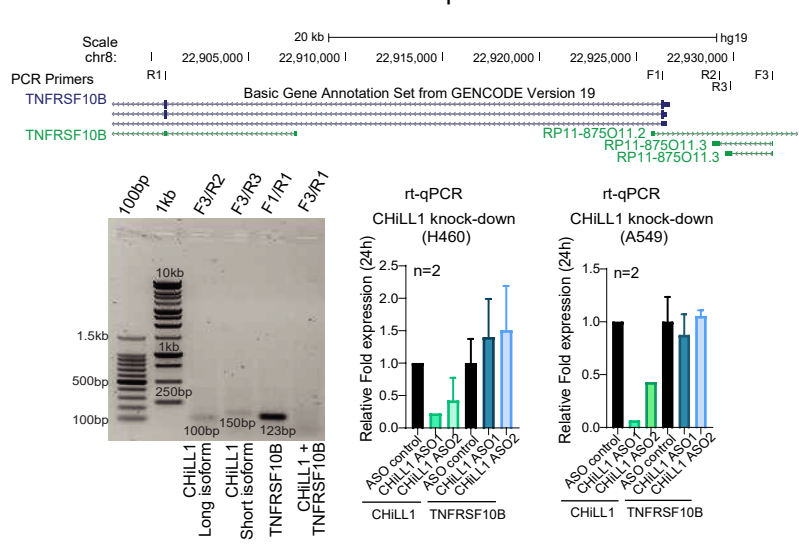

**D** GCAWKR locus

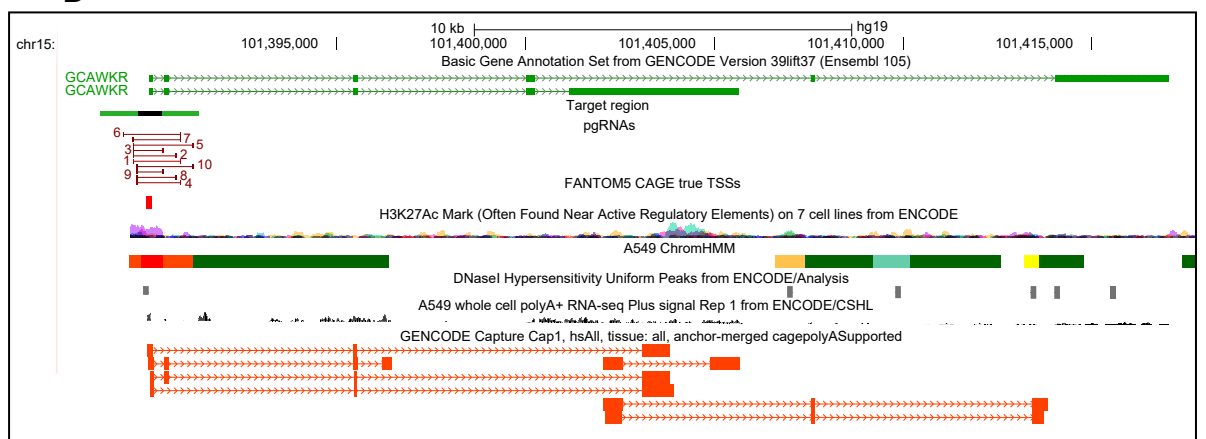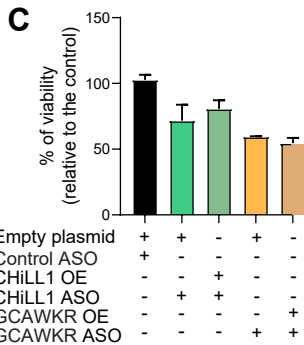

**E** CHILL1 genomic elements

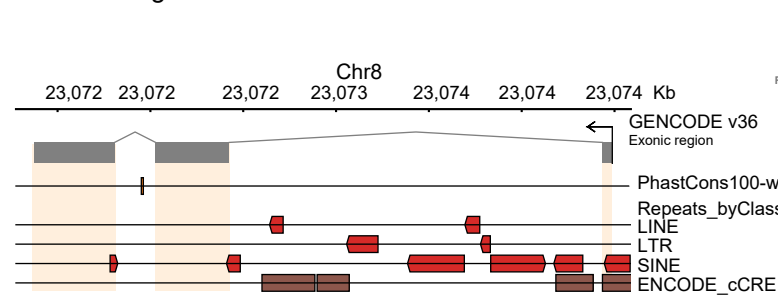

**F** GCAWKR amplified genomic region

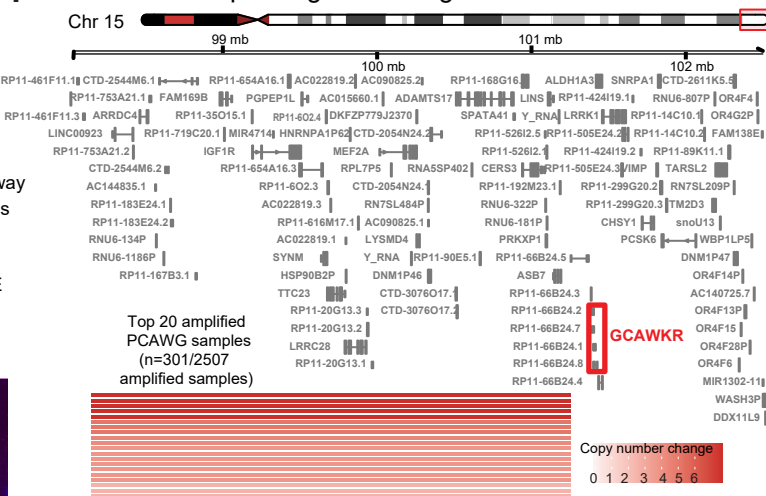

**G** Fluorescence in-situ hybridisation (FISH)

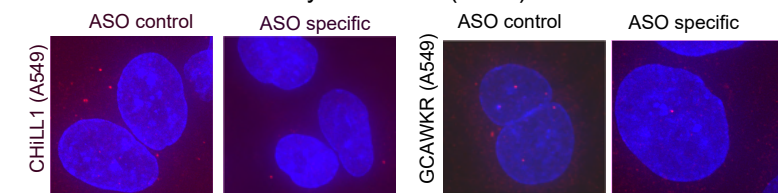

**H** GCAWKR conservation

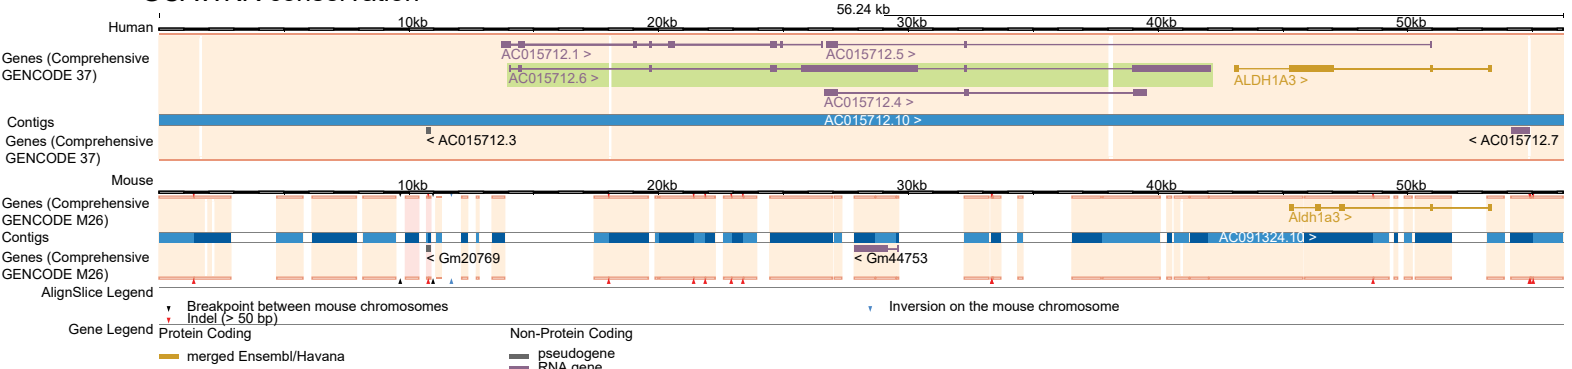

**Figure S5. Further information on CHiLL1 and GCAWKR. Related to Figure 5.**

(A) Tracks to support for CHiLL1 gene structure, and the lack of evidence for read through transcription between CHiLL1 and TNFRSF10B, from expressed sequence tags (ESTs).

(B) Searching for evidence of read through transcription between *CHiLL1* and *TNFRSF10B*. (Left) Agarose gel electrophoresis of RT-qPCR products using indicated primers with A549 cDNA. *CHiLL1* + *TNFRSF10B* indicates a PCR performed with the forward primer (F3 in the figure) in the lncRNA exon1 and reverse primer (R1) in the second exon of TNFRSF10B. (Right) Expression of RNA from CHiLL1 locus, and primers used.

(C) Rescue experiment. Cell viability after transfection with CHiLL1 transgene + *ChiLL1* ASO, and GCAWKR + GCAWKR ASO. n=3.

(D) GCAWKR genomic locus. The GCAWKR annotated TSS is supported by multiple evidence, including FANTOM CAGE, and it is shown the annotation of the full-length transcript with Capture Long-Read Sequencing<sup>122</sup>.

(E) Genomic elements in the CHiLL1 locus. GENCODE v36 exons were merged into a single transcript and queried against a set of genome-wide element annotations using ezTracks<sup>94</sup>.

(F) Recurrently amplified genomic region that encompasses GCAWKR according to Pan-Cancer Analysis of Whole Genomes (PCAWG) Consortium. Ensembl 75 (hg19) annotation was used. For each gene, the longest transcript is shown. GCAWKR locus is highlighted. The copy number gain for the top 20 amplified samples in PCAWG is shown.

(G) Representative confocal microscopy images of RNA-FISH performed with *CHiLL1*, *GCAWKR* probe sets upon treatment with targeting ASOs or non-targeting ASO control in A549 cells. Selected lncRNA foci in the treated sample and in the control are arrowed.

(H) GCAWKR orthology between human annotation (GENCODE 37) and mouse (GENCODE M26).

Figure S6

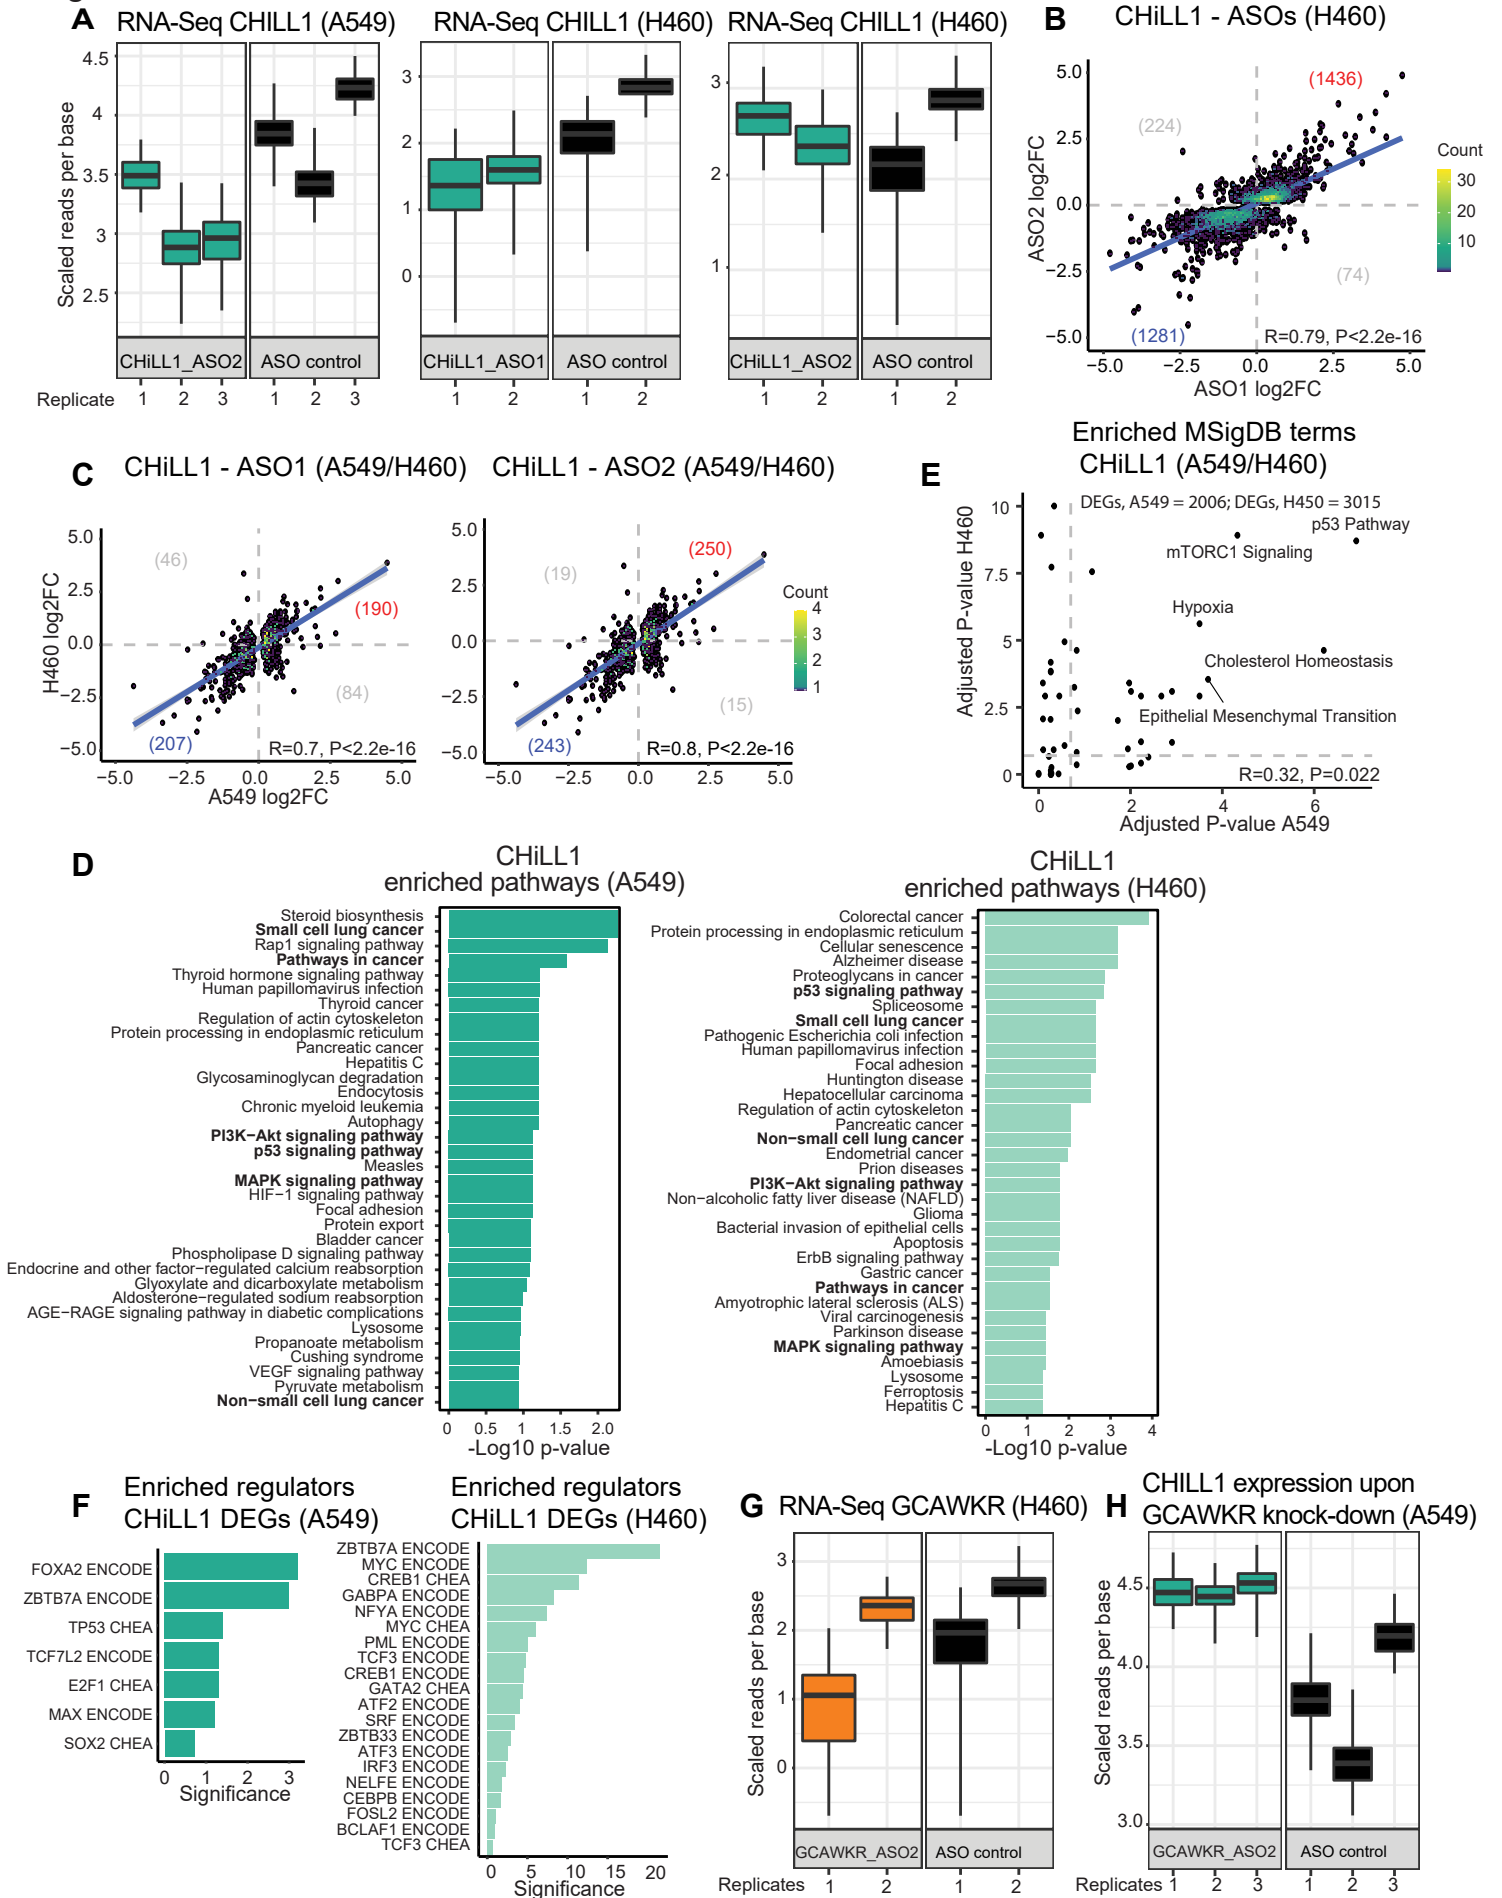

**Figure S6. CHiLL1 and GCAWKR perturbation impacts disease transcriptome.**

**Related to Figure 6.** (A) Response of *CHiLL1* expression to ASO transfection, as measured by RNA-seq. The y-axis represents the normalised expression (counts) per nucleotide and the boxplots show the variance of inference using bootstraps from Kallisto.

(B) Changes in gene expression (log<sub>2</sub> FC) with two different *CHiLL1* ASOs in H460. Numbers indicate the differentially expressed genes in each part of the scatter plot. Statistical significance: Pearson correlation.

(C) as for (B), but comparing effects of the same *CHiLL1* ASO in two cell backgrounds (left: ASO1; right: ASO2).

(D) KEGG pathways enriched for *CHiLL1* target genes, for A549 (left) and H460 (right) cells. Analysis was performed using common differentially expressed genes between the ASO1 and ASO2 knockdown.

(E) Gene ontology analysis performed using the Molecular Signatures Database (MSigDB). Shown are enriched terms between A549 and H460 cells by using the set of common differentially-expressed genes of ASO1&2 for *CHiLL1*. Statistical significance: Pearson correlation.

(F) Binding sites<sup>115,123</sup> enriched in the intersection of differentially expressed genes (DEGs) from ASO1&2 knockdown of *CHiLL1*.

(G) Expression of *GCAWKR* in H460 in response to *GCAWKR* ASOs. The y-axis represents the normalised expression (counts) per nucleotide and the boxplots show the variance of inference using the bootstraps of Kallisto.

(H) Expression of *CHiLL1* (RNA-seq) upon ASO knockdown of *GCAWKR*. The y-axis represents the normalised expression (counts) per nucleotide and the boxplots show the variance of inference using the bootstraps of Kallisto.

**Data S4.** Related to Star Methods.

**CRISPETA runs. Related to Methods (Library design).**

|     | Run1          | Run2          | Run3 |  | Run4          | Run5          | Run6          | Run7          | Run8          |
|-----|---------------|---------------|------|--|---------------|---------------|---------------|---------------|---------------|
| -eu | 0             |               |      |  |               |               |               |               |               |
| -ed | 0             |               |      |  |               |               |               |               |               |
| -du | 1000          |               | 1200 |  |               |               |               |               |               |
| -dd | 1000          |               | 1200 |  |               |               |               |               |               |
| -si | 0.2           |               |      |  |               |               |               |               | 0             |
| -t  | 0,0,0,x,<br>x | 0,0,1,x,<br>x |      |  | 0,0,5,x,<br>x | 0,1,5,x,<br>x | 0,x,x,x,<br>x | 1,x,x,x,<br>x | 1,x,x,x,<br>x |

**PCR reaction ssDNA to dsDNA. Related to Methods (Library cloning).**

| Component                              | Amount per reaction |
|----------------------------------------|---------------------|
| 5x Buffer                              | 20 ul               |
| dNTPs 10 mM                            | 3 ul                |
| Forward oligo 100uM                    | 2 ul                |
| Reverse oligo 100 uM                   | 2 ul                |
| Template DNA 10ng/ul                   | 2 ul                |
| Phusion Polymerase High Fidelity 2U/ul | 2ul                 |
| UltraPure water                        | Up to 100 ul        |

**pDECKO\_backbone plasmid digestion. Related to Methods (Library cloning).**

| Component        | Amount per reaction |
|------------------|---------------------|
| pDECKO plasmid   | 5 ug                |
| Tango 10x Buffer | 5 ul                |
| DTT (20mM)       | 2.5 ul              |
| Esp3I (BsmBI)    | 1 ul                |
| UltraPure H2O    | Up to 50 ul         |

**Long oligos to generate pDECKO constant part (HPLC purification). Related to Methods (Library cloning).**

| Oligos                      | Sequences (5'-3')                                                                                                                                                |
|-----------------------------|------------------------------------------------------------------------------------------------------------------------------------------------------------------|
| Forward_1<br>(F1)<br>125 bp | TAGAAATAGCAAGTTAAAATAAGGCTAGTCCGTTATCAACTTGAA<br>AAAGTGGCACCCGAGTCGGTGCTTTTTTTGAACGCTGACGTCATCA<br>ACCCGCTCCAAGGAATCGCGGGGCCAGTGCTACTAG                          |
| Forward_2<br>(F2)<br>148 bp | GCGGGAACACCCAGCGCGCGTGCGCCCTGGCAGGAAGATGGCT<br>GTGAGGGACAGGGGAGTGGCGCCCTGCAATATTTGCATGTCGCT<br>ATGTGTTCTGGGAAATCACCATAAACGTGAAATGTCTTTGGATTT<br>GGGAGTCTTATAAGTT |
| Reverse_1<br>(R1)<br>146 bp | GCGCACGCGCGCTGGGTGTTCCCGCCTAGTGACACTGGGCCCCG<br>CGATTCCTTGGAGCGGGTTGATGACGTCAGCGTTCAAAAAAGCA<br>CCGACTCGGTGCCACTTTTTCAAGTTGATAACGGACTAGCCTTAT<br>TTAACTTGCTATT   |
| Reverse_2<br>(R2)<br>127 bp | ACAGAACTTATAAGACTCCCAAATCCAAAGACATTTACGTTTATG<br>GTGATTTCCCAGAACACATAGCGACATGCAAATATTGCAGGGCG<br>CCACTCCCCTGTCCCTCACAGCCATCTTCTGCCAGG                            |

**Colony PCR primers. Related to Methods (Library cloning).**

| Primer          | Sequences (5'-3')    |
|-----------------|----------------------|
| Oligo_colony_Fw | GTACAAAATACGTGACGTAG |
| Oligo_colony_Rv | ATGTCTACTATTCTTTCCCC |

**Colony PCR reaction. Related to Methods (Library cloning).**

| 95°C 2', 95°C 30", 60°C 40", 72°C 2' for 29 cycles, 72°C 2', 4°C forever |                     |
|--------------------------------------------------------------------------|---------------------|
| Component                                                                | Amount per reaction |
| 5x Buffer                                                                | 10 ul               |
| dNTPs 10 mM                                                              | 1 ul                |
| Oligo_colony_Fw 10 uM                                                    | 1 ul                |
| Oligo_colony_Rv 10 uM                                                    | 1 ul                |
| Template colony                                                          | 2 ul                |
| Go Taq G2 polimerase (Promega)                                           | 0.25 ul             |
| Nuclease-free water                                                      | Up to 50 ul         |

**Primers for the genomic deletion. Related to Methods (PCR amplification from genomic DNA).**

|                        |                         |
|------------------------|-------------------------|
| gDNA_Candidate_331_For | TTGCAACCCCCAAACAGACT    |
| gDNA_Candidate_331_Rev | GGGGCACCATTTTGGACCTA    |
| gDNA_Candidate_205_For | AGCCTGTCACAAACTGATTCTTA |
| gDNA_Candidate_205_Rev | TTGTTGACCCGGAAACGGAT    |

**Composition of lung cancer organoids medium. Related to Methods (Patient-derived xenograft organoids)**

| Substances               | Final Conc. | Supplier                 | Catalogue number        |
|--------------------------|-------------|--------------------------|-------------------------|
| DMEM:F-12 HAM medium     | -           | Sigma-Aldrich            | D6421                   |
| EGF                      | 50 ng/mL    | Thermo Fisher Scientific | PHG6045                 |
| FGF                      | 20 ng/mL    | Thermo Fisher Scientific | PHG6015                 |
| L-Glutamine              | 2 mM        | Sigma-Aldrich            | G7513-100mL             |
| OmniPur HEPES            | 10 mM       | Sigma-Aldrich            | 5320-500GM              |
| Penicillin/Streptomycin  | 100 U/mL    | Sigma-Aldrich            | P3032-10MU<br>S6501-25G |
| N-2 supplement           | 1x          | Thermo Fisher Scientific | 17502-048               |
| B-27 supplement          | 1x          | Thermo Fisher Scientific | 17504-044               |
| Noggin                   | 100 ng/mL   | Prospect                 | CYT-475                 |
| ROCK-inhibitor (Y-27632) | 10 $\mu$ M  | Stemcell                 | 72304                   |



**Primers RT-qPCR. Related to Methods (RNA isolation and RT-qPCR).**

|                                         |                          |
|-----------------------------------------|--------------------------|
| HPRT1_For                               | ATGACCAGTCAACAGGGGACAT   |
| HPRT1_Rev                               | CAACACTTCGTGGGGTCCTTTTCA |
| Candidate_331_For                       | CAGGGAGCAGGGACTATCAA     |
| Candidate_331_Rev                       | TGGTCTTCCAACATGGGCTTG    |
| Candidate_205_For (LINC00115)           | CCTAGTTCTCTTCACCGTCCG    |
| Candidate_205_Rev (LINC00115)           | AAGACAAGCCACATGCCGAA     |
| Candidate_205_For (LINC01128)           | AGAGGTTAAAAGTCACAAGGGTGT |
| Candidate_205_Rev (LINC01128)           | GCCTTGACAGCAAGCCTAGA     |
| Candidate_42_For<br>(ENST00000520840.2) | GCAGTGACCCAGAATGAGGAAG   |
| Candidate_42_Rev<br>(ENST00000520840.2) | TACTGAAATTGGAGGCTGTGGA   |
| Candidate_42_For<br>(ENST00000523806.1) | GCAGTGACCCAGAATGAGGT     |
| Candidate_42_Rev<br>(ENST00000523806.1) | GCTCTAGCTTCCAGGTTGGG     |
| Candidate_240_For                       | CTCACGGCAGCTATGAGACT     |
| Candidate_240_Rev                       | GCTCCAAGATGCCACTCACA     |
| Candidate_448_For                       | GAAACCTCCTCGACACTCCG     |
| Candidate_448_Rev                       | AGTCTTCGAACAGGCTGCAA     |
| Candidate_215_For                       | GCAATTGTACCTGAGGACCCA    |
| Candidate_215_Rev                       | TGGCATATGGTGGATGTTCCC    |
| Candidate_489_For                       | AAGCGCTCATTCAAGGTTGC     |
| Candidate_489_Rev                       | GGTTCAGTCTGGGCCCTTTT     |
| Candidate_408_For                       | GCGATGGAAGAAGTTTCGCC     |
| Candidate_408_Rev                       | GGAACTCAGGTAACAGGAATTTAC |
| Candidate_316_For                       | GACCAACTCCGTTTCCCGAT     |

|                   |                      |
|-------------------|----------------------|
| Candidate_316_Rev | TCAAGGGCCCAGCCTTATTC |
| Candidate_635_For | AATTCCACCCACGCACCTAT |
| Candidate_635_Rev | GAGCCACCGTTAATTCAGCC |
| Candidate_507_For | TCCTTGCTAACCACACGGAC |
| Candidate_507_Rev | ATGTGGGTCCCAGTATCCGA |
| Candidate_509_For | TTGGCACACTCAGATGCGAT |
| Candidate_509_Rev | AAACAGTCCCGCTTGGGAT  |
| GAPDH_For         | GCACCGTCAAGGCTGAGAAC |
| GAPDH_Rev         | TGGTGAAGACGCCAGTGGGA |
| MALAT1_For        | GATTGAGGCGTTTTCCAAGA |
| MALAT1_Rev        | ACTTTCTCCCCCAACTGCTT |

**pgRNA guides for CRISPR deletion. Related to Methods (DECKO and lentiviral production).**

| Gene Target | Candidate | sgRNA1                    | sgRNA2                    |
|-------------|-----------|---------------------------|---------------------------|
| DNMBP-AS1   | 331_1     | GTAATATTCAGGAAG<br>GGCAA  | GCTCTAAACAAAACCTAGAGA     |
| DNMBP-AS1   | 331_2     | GCTGGTTTTCAGGGAG<br>ATCAG | GCTCTAAACAAAACCTAGAGA     |
| DNMBP-AS1   | 331_3     | TGATCTCCCTGAAACC<br>AGCT  | GCTCTAAACAAAACCTAGAGA     |
| DNMBP-AS1   | 331_4     | ACACTTTGATTACAGT<br>TGGG  | GCTCTAAACAAAACCTAGAGA     |
| DNMBP-AS1   | 331_5     | GTAATATTCAGGAAG<br>GGCAA  | GAAAACCTATGAAAACCTAGAGA   |
| DNMBP-AS1   | 331_6     | GCTGGTTTTCAGGGAG<br>ATCAG | GAAAACCTATGAAAACCTAGAGA   |
| DNMBP-AS1   | 331_7     | GTAATATTCAGGAAG<br>GGCAA  | GCTAAAGGTTTCAGGGTT<br>GGA |

|                                 |                   |                          |                           |
|---------------------------------|-------------------|--------------------------|---------------------------|
| DNMBP-AS1                       | 331_9             | GTAATATTCAGGAAG<br>GGCAA | GCACTTGCTAATAACATA<br>CA  |
| DNMBP-AS1                       | 331_10            | GCTGGTTTCAGGGAG<br>ATCAG | GCTAAAGGTTTCAGGGTT<br>GGA |
| LINC01128;<br>LINC00115         | 205_2             | CCTCCTCTATATGAAC<br>TCCA | GCGGACGGTGAAGAGAA<br>CTA  |
| LINC01128;<br>LINC00115         | 205_2             | CCTCCTCTATATGAAC<br>TCCA | GCAAACCCCACGCTTCG<br>GGG  |
| CHiLL1                          | 42_2              | GAGACATTAGTGGAC<br>ATAGA | GGATGGGTGAGCCAACC<br>TCA  |
| CHiLL1                          | 42_8              | ATAGTAAGTCAAAGTA<br>ATGG | GAGCAAATTCTCCCTTG<br>GGAA |
| CHiLL1                          | 42_10             | ATTGTTTGCCCAATGC<br>AGAG | GCTTCTGCTGCCTTTCC<br>CAA  |
| GCAWKR                          | 240_6             | GTACCACAGACACTA<br>CAGTT | TCTGAGCACAGTGATTC<br>CGG  |
| GCAWKR                          | 240_8             | TGCACTTTCCCAGATA<br>ACAC | GCTAGTAAACCCACAGC<br>GGAC |
| GCAWKR                          | 240_9             | TCGAATGTTCCATTC<br>CTCA  | GCTAGTAAACCCACAGC<br>GGAC |
| GCAWKR                          | 240_10            | TTTGTTAGTTCCTTT<br>TAGC  | GCTAGTAAACCCACAGC<br>GGAC |
| lncRNA not annotated in GENCODE | 509_3             | ACAGGCGCTTTTCTGT<br>TCAG | GTTACTTCTACGCGTTCA<br>CGT |
| AASV1                           | targeting control | ACTCTTTAAGGAAAGA<br>AGGA | CCTCAGTCTGAAGAGCA<br>GAGC |
